# Supplementary material for: Public hospitalizations for stroke in Brazil from 2009 to 2016
Source: PubMed Central journal article supplement (PMC6424448; doi:10.1371/journal.pone.0213837), 2019-03-19
Supplement: pone.0213837.s001.pdf [file pone.0213837.s001.pdf]

**S1 Table. List of attributes from SIHSUS database used in this work.**

| <b>Attribute</b>                  | <b>Description</b>                                                                                                    |
|-----------------------------------|-----------------------------------------------------------------------------------------------------------------------|
| ano_cmpt                          | AIH processing year                                                                                                   |
| mes_cmpt                          | AIH processing month                                                                                                  |
| n_aih                             | AIH unique Id                                                                                                         |
| Nasc                              | Date of birth of patient                                                                                              |
| Sexo                              | Gender of the patient (1 = male, 3 = female)                                                                          |
| diag_princ                        | Principal diagnosis (ICD-10)                                                                                          |
| diag_secun                        | Secondary diagnosis (ICD-10)                                                                                          |
| diagsecN (1, 2, 3, 4, 5, 6, 7, 8) | List of secondary diagnoses (ICD-10)                                                                                  |
| cid_asso                          | Complementary causes diagnosis (ICD-10)                                                                               |
| cid_morte                         | Cause of death diagnosis (ICD-10)                                                                                     |
| Cobranca                          | Discharge disposition reason (discharge to home, continue hospitalization, transfer, death etc.)                      |
| Morte                             | Indicates death of patient (0 = not died, 1 = died)                                                                   |
| raca_cor                          | Race/Ethnicity of the patient (White = 01, Black = 02, Brown = 03, Yellow = 04, Indigenous = 05, No Information = 99) |
| dt_inter                          | Date of patient's hospitalization                                                                                     |
| ano_atendimento*                  | Year (4 digits) in which the patient was hospitalized - dt_inter yyyy                                                 |
| mês*                              | Month (2 digits) in which the patient was hospitalized - dt_inter mm                                                  |
| idade_real_anos*                  | Age of patient calculated by difference of date of admission (dt_inter) and date of birth (nasc)                      |

Attributes with \* are not original from SIHSUS, they were obtained from the original attributes in order to facilitate the analysis.
