# Supplementary material for: Public hospitalizations for stroke in Brazil from 2009 to 2016
Source: PubMed Central journal article supplement (PMC6424448; doi:10.1371/journal.pone.0213837), 2019-03-19
Supplement: pone.0213837.s002.pdf [file pone.0213837.s002.pdf]

S2 Table. Population projection data obtained from the Brazilian Institute of Geography and Statistics for each year, age and sex.

| MALE     |          |          |          |          |          |           |           |           | FEMALE   |          |          |          |           |           |           |           |           |
|----------|----------|----------|----------|----------|----------|-----------|-----------|-----------|----------|----------|----------|----------|-----------|-----------|-----------|-----------|-----------|
| AGE/YEAR | 2009     | 2010     | 2011     | 2012     | 2013     | 2014      | 2015      | 2016      | AGE/YEAR | 2009     | 2010     | 2011     | 2012      | 2013      | 2014      | 2015      | 2016      |
| TOTAL    | 95776055 | 96706703 | 97610297 | 98487258 | 99336858 | 100159507 | 100955522 | 101726102 | TOTAL    | 97767914 | 98791094 | 99786721 | 100755204 | 101695856 | 102609055 | 103495127 | 104355330 |
| 0        | 1599362  | 1576092  | 1553693  | 1532168  | 1511533  | 1491806   | 1472923   | 1454693   | 0        | 1527540  | 1504994  | 1483321  | 1462526   | 1442617   | 1423609   | 1405421   | 1387881   |
| 1        | 1617369  | 1593861  | 1570943  | 1548867  | 1527630  | 1507260   | 1487773   | 1469113   | 1        | 1546624  | 1523593  | 1501283  | 1479820   | 1459218   | 1439487   | 1420642   | 1402602   |
| 2        | 1639305  | 1615647  | 1592359  | 1569508  | 1547495  | 1526312   | 1505999   | 1486568   | 2        | 1568729  | 1545349  | 1522444  | 1500184   | 1478770   | 1458216   | 1438525   | 1419723   |
| 3        | 1661706  | 1638154  | 1614632  | 1591387  | 1568578  | 1546600   | 1525452   | 1505176   | 3        | 1591308  | 1567863  | 1544562  | 1521692   | 1499464   | 1478080   | 1457554   | 1437892   |
| 4        | 1683996  | 1660790  | 1637340  | 1613853  | 1590639  | 1567858   | 1545908   | 1524795   | 4        | 1613881  | 1590614  | 1567228  | 1543953   | 1521112   | 1498905   | 1477543   | 1457045   |
| 5        | 1705943  | 1683263  | 1660157  | 1636737  | 1613272  | 1590079   | 1567320   | 1545412   | 5        | 1636211  | 1613340  | 1590137  | 1566771   | 1543514   | 1520695   | 1498502   | 1477173   |
| 6        | 1727378  | 1705359  | 1682722  | 1659656  | 1636253  | 1612806   | 1589633   | 1566912   | 6        | 1658099  | 1635787  | 1612947  | 1589772   | 1566424   | 1543182   | 1520383   | 1498215   |
| 7        | 1748033  | 1726787  | 1704811  | 1682212  | 1659166  | 1635782   | 1612355   | 1589219   | 7        | 1679370  | 1657668  | 1635387  | 1612576   | 1589422   | 1566088   | 1542861   | 1520092   |
| 8        | 1768565  | 1747437  | 1726230  | 1704295  | 1681715  | 1658688   | 1635321   | 1611934   | 8        | 1700483  | 1678937  | 1657264  | 1635012   | 1612220   | 1589082   | 1565760   | 1542565   |
| 9        | 1750820  | 1767963  | 1746875  | 1725709  | 1703793  | 1681232   | 1658223   | 1634893   | 9        | 1687270  | 1700046  | 1675630  | 1656882   | 1634651   | 1611875   | 1588751   | 1565458   |
| 10       | 1754902  | 1750146  | 1767315  | 1746273  | 1725126  | 1703230   | 1680698   | 1657725   | 10       | 1690601  | 1686808  | 1699609  | 1678127   | 1656496   | 1634282   | 1611522   | 1588432   |
| 11       | 1753142  | 1754147  | 1749429  | 1766628  | 1745610  | 1724487   | 1702616   | 1680129   | 11       | 1690319  | 1690106  | 1686347  | 1699176   | 1677719   | 1656104   | 1633905   | 1611180   |
| 12       | 1750977  | 1752390  | 1753426  | 1748749  | 1765962  | 1744962   | 1723865   | 1702038   | 12       | 1689707  | 1689826  | 1689647  | 1685920   | 1698760   | 1677321   | 1655721   | 1633558   |
| 13       | 1749463  | 1750226  | 1751671  | 1752746  | 1748088  | 1765310   | 1744335   | 1723283   | 13       | 1689486  | 1689218  | 1689368  | 1689223   | 1685509   | 1698360   | 1676936   | 1655372   |
| 14       | 1748426  | 1748713  | 1749508  | 1750992  | 1752083  | 1747445   | 1764675   | 1743745   | 14       | 1689563  | 1688997  | 1688762  | 1688943   | 1688813   | 1685111   | 1697970   | 1676582   |
| 15       | 1746816  | 1746415  | 1746766  | 1747630  | 1749159  | 1750296   | 1745704   | 1762974   | 15       | 1689910  | 1688876  | 1688348  | 1688148   | 1688352   | 1688236   | 1684551   | 1697442   |
| 16       | 1745230  | 1743568  | 1743214  | 1743664  | 1744606  | 1746203   | 1747409   | 1742917   | 16       | 1691037  | 1689024  | 1688030  | 1687543   | 1687368   | 1687597   | 1687500   | 1683854   |
| 17       | 1744887  | 1741993  | 1740381  | 1740123  | 1740646  | 1741665   | 1743331   | 1744620   | 17       | 1693225  | 1690153  | 1688179  | 1687227   | 1686766   | 1686613   | 1686861   | 1686804   |
| 18       | 1745798  | 1741659  | 1738817  | 1737303  | 1737120  | 1737720   | 1738806   | 1740556   | 18       | 1696538  | 1692342  | 1689310  | 1687376   | 1686453   | 1686013   | 1685880   | 1686165   |
| 19       | 1745874  | 1742574  | 1738488  | 1735749  | 1734314  | 1734204   | 1734873   | 1736046   | 19       | 1698911  | 1695653  | 1691497  | 1688510   | 1688603   | 1685701   | 1685285   | 168186    |
| 20       | 1742071  | 1741793  | 1738578  | 1734620  | 1731978  | 1730640   | 1730618   | 1731395   | 20       | 1698150  | 1697923  | 1694718  | 1690610   | 1687649   | 1685769   | 1684890   | 1684527   |
| 21       | 1745055  | 1737136  | 1736944  | 1733882  | 1730052  | 1727526   | 1726297   | 1726402   | 21       | 1705074  | 1697056  | 1696888  | 1693740   | 1689660   | 1686727   | 1684875   | 1684048   |
| 22       | 1759920  | 1740118  | 1732306  | 1732261  | 1729327  | 1725611   | 1723198   | 1722101   | 22       | 1724184  | 1703976  | 1696018  | 1695905   | 1692790   | 1688739   | 1685834   | 1684036   |
| 23       | 1780157  | 1754950  | 1735287  | 1727643  | 1727711  | 1724900   | 1721297   | 1719018   | 23       | 1749058  | 1723076  | 1702932  | 1695039   | 1694956   | 1691869   | 1687843   | 1684995   |
| 24       | 1798083  | 1775142  | 1750087  | 1730623  | 1723115  | 1723292   | 1720597   | 1717128   | 24       | 1770846  | 1747937  | 1722023  | 1701950   | 1694088   | 1694032   | 1690974   | 1687004   |
| 25       | 1817599  | 1792969  | 1770193  | 1745352  | 1726053  | 1718681   | 1718967   | 1716421   | 25       | 1793245  | 1769566  | 1746738  | 1720901   | 1700876   | 1693047   | 1693022   | 1690028   |
| 26       | 1817985  | 1812352  | 1787925  | 1765372  | 1740712  | 1721575   | 1714336   | 1714766   | 26       | 1797222  | 1791795  | 1768207  | 1745465   | 1719683   | 1699709   | 1691916   | 1691962   |
| 27       | 1789490  | 1812743  | 1807250  | 1783056  | 1760688  | 1736205   | 1717223   | 1710149   | 27       | 1773307  | 1795770  | 1790419  | 1766921   | 1744232   | 1718505   | 1698577   | 1690855   |
| 28       | 1741757  | 1784334  | 1807641  | 1802328  | 1778325  | 1756135   | 1731820   | 1713031   | 28       | 1730781  | 1771879  | 1794392  | 1789117   | 1765677   | 1743036   | 1717361   | 1697509   |
| 29       | 1695974  | 1736753  | 1779323  | 1802720  | 1797544  | 1773729   | 1751709   | 1727594   | 29       | 1689463  | 1729392  | 1770525  | 1793089   | 1787855   | 1764469   | 1741877   | 1716286   |
| 30       | 1648794  | 1690925  | 1731684  | 1774286  | 1797740  | 1792705   | 1769082   | 1747259   | 30       | 1646085  | 1687868  | 1727820  | 1768995   | 1791577   | 1786390   | 1763067   | 1740552   |
| 31       | 1602036  | 1643685  | 1685814  | 1726594  | 1769190  | 1792707   | 1787813   | 1764410   | 31       | 1603083  | 1644295  | 1686094  | 1726078   | 1767256   | 1789862   | 1784724   | 1761499   |
| 32       | 1559695  | 1597089  | 1638734  | 1680870  | 1721651  | 1764242   | 1787816   | 1783087   | 32       | 1564282  | 1601343  | 1642577  | 1684397   | 1724388   | 1765570   | 1788196   | 1783136   |
| 33       | 1520564  | 1554894  | 1592297  | 1633946  | 1676072  | 1716850   | 1759437   | 1783088   | 33       | 1528548  | 1562592  | 1599675  | 1640932   | 1682751   | 1722747   | 1763934   | 1786607   |
| 34       | 1479365  | 1515888  | 1550237  | 1587663  | 1629300  | 1671412   | 1712183   | 1754791   | 34       | 1490804  | 1526898  | 1560966  | 1598079   | 1639338   | 1681157   | 1721155   | 1762369   |
| 35       | 1436171  | 1474429  | 1510949  | 1545332  | 1582756  | 1624381   | 1666476   | 1707255   | 35       | 1451103  | 1488904  | 1525014  | 1559113   | 1596226   | 1637484   | 1679299   | 1719314   |
| 36       | 1399224  | 1430991  | 1469234  | 1505769  | 1540166  | 1577587   | 1619192   | 1661286   | 36       | 1417691  | 1448965  | 1486774  | 1522902   | 1557008   | 1594121   | 1635372   | 1677198   |
| 37       | 1372411  | 1394187  | 1425964  | 1464207  | 1500744  | 1535147   | 1572564   | 1614167   | 37       | 1394276  | 1415610  | 1446901  | 1484723   | 1520849   | 1554962   | 1592073   | 1633333   |
| 38       | 1352413  | 1367478  | 1389301  | 1421105  | 1459333  | 1495865   | 1530272   | 1567699   | 38       | 1377577  | 1392231  | 1413597  | 1444910   | 1482726   | 1518855   | 1552967   | 1590095   |
| 39       | 1332103  | 1347557  | 1362698  | 1384576  | 1416390  | 1454599   | 1491125   | 1525553   | 39       | 1360417  | 1375559  | 1390254  | 1411657   | 1442972   | 1480784   | 1516915   | 1551042   |
| 40       | 1311417  | 1326616  | 1342145  | 1357377  | 1379299  | 1411120   | 1449307   | 1485836   | 40       | 1342929  | 1357946  | 1373129  | 1387871   | 1409295   | 1440612   | 1478418   | 1514552   |
| 41       | 1291255  | 1305286  | 1320580  | 1336203  | 1351518  | 1373488   | 1405309   | 1443483   | 41       | 1326200  | 1340001  | 1355069  | 1370297   | 1385077   | 1406523   | 1437840   | 1475641   |
| 42       | 1271900  | 1285229  | 1299354  | 1314742  | 1330443  | 1345833   | 1367848   | 1399680   | 42       | 1310338  | 1323313  | 1337164  | 1352277   | 1367540   | 1382354   | 1403820   | 1435146   |
| 43       | 1252533  | 1265967  | 1279395  | 1293614  | 1309081  | 1324852   | 1340313   | 1362384   | 43       | 1294425  | 1307491  | 1320516  | 1334414   | 1349560   | 1364857   | 1379704   | 1401196   |
| 44       | 1233688  | 1246699  | 1260228  | 1273751  | 1288048  | 1303590   | 1319428   | 1334964   | 44       | 1278765  | 1291616  | 1304732  | 1317804   | 1331736   | 1346914   | 1362239   | 1377128   |
| 45       | 1214836  | 1226829  | 1239943  | 1253572  | 1267183  | 1281563   | 1297179   | 1313092   | 45       | 1263257  | 1275239  | 1288151  | 1301320   | 1314431   | 1328402   | 1343616   | 1358985   |

| MALE     |         |         |         |         |         |         |         |         | FEMALE   |         |         |         |         |         |         |         |         |
|----------|---------|---------|---------|---------|---------|---------|---------|---------|----------|---------|---------|---------|---------|---------|---------|---------|---------|
| AGE/YEAR | 2009    | 2010    | 2011    | 2012    | 2013    | 2014    | 2015    | 2016    | AGE/YEAR | 2009    | 2010    | 2011    | 2012    | 2013    | 2014    | 2015    | 2016    |
| 46       | 1189131 | 1206964 | 1219071 | 1232293 | 1246015 | 1259717 | 1274181 | 1289877 | 46       | 1240935 | 1259017 | 1271065 | 1284043 | 1297258 | 1310413 | 1324427 | 1339686 |
| 47       | 1154877 | 1181430 | 1199340 | 1211558 | 1224873 | 1238684 | 1252471 | 1267016 | 47       | 1209516 | 1236781 | 1254903 | 1267014 | 1280040 | 1293298 | 1306496 | 1320560 |
| 48       | 1114897 | 1147408 | 1173974 | 1191956 | 1204272 | 1217676 | 1231562 | 1245436 | 48       | 1171940 | 1205464 | 1232745 | 1250911 | 1263072 | 1276141 | 1289440 | 1302688 |
| 49       | 1075868 | 1107693 | 1140171 | 1166757 | 1184793 | 1197205 | 1210687 | 1224652 | 49       | 1134958 | 1168016 | 1201534 | 1228829 | 1247023 | 1259232 | 1272338 | 1285690 |
| 50       | 1035272 | 1067408 | 1099197 | 1131638 | 1158226 | 1176327 | 1188840 | 1202414 | 50       | 1096571 | 1130277 | 1163314 | 1196814 | 1224106 | 1242330 | 1254590 | 1267744 |
| 51       | 993644  | 1025662 | 1057717 | 1089459 | 1121846 | 1148430 | 1166590 | 1179222 | 51       | 1057506 | 1091177 | 1124845 | 1157851 | 1191314 | 1218600 | 1236852 | 1249170 |
| 52       | 953749  | 984423  | 1016353 | 1048351 | 1080039 | 1112364 | 1138937 | 1157162 | 52       | 1019904 | 1052306 | 1085937 | 1119566 | 1152535 | 1185958 | 1213231 | 1231515 |
| 53       | 914956  | 944898  | 975491  | 1007361 | 1039291 | 1070918 | 1103177 | 1129738 | 53       | 983145  | 1014891 | 1047253 | 1080844 | 1114429 | 1147357 | 1180739 | 1208006 |
| 54       | 876465  | 906468  | 936327  | 966863  | 998662  | 1030521 | 1062076 | 1094276 | 54       | 946131  | 978314  | 1010021 | 1042344 | 1075886 | 1109426 | 1142312 | 1175656 |
| 55       | 837049  | 866692  | 896576  | 926349  | 956792  | 988490  | 1020243 | 1051704 | 55       | 908240  | 940419  | 972542  | 1004199 | 1036467 | 1069944 | 1103419 | 1136255 |
| 56       | 796410  | 826096  | 855598  | 885357  | 915007  | 945327  | 976890  | 1008512 | 56       | 869460  | 901707  | 933814  | 965861  | 997451  | 1029643 | 1063040 | 1096441 |
| 57       | 756379  | 785987  | 815522  | 844895  | 874519  | 904047  | 934238  | 965663  | 57       | 831046  | 863208  | 895372  | 927402  | 959373  | 990884  | 1023003 | 1056321 |
| 58       | 717049  | 746477  | 775924  | 805320  | 834554  | 864046  | 893446  | 923506  | 58       | 793079  | 825071  | 857144  | 889230  | 921173  | 953061  | 984499  | 1016541 |
| 59       | 679777  | 707658  | 736917  | 766214  | 795468  | 824557  | 853916  | 883186  | 59       | 756658  | 787373  | 819281  | 851261  | 883258  | 915115  | 946918  | 978283  |
| 60       | 643180  | 669181  | 696858  | 725907  | 755001  | 784057  | 812957  | 842129  | 60       | 720846  | 749921  | 780521  | 812307  | 844165  | 876045  | 907787  | 939488  |
| 61       | 604807  | 631482  | 657277  | 684713  | 713499  | 742338  | 771147  | 799809  | 61       | 683598  | 713148  | 742104  | 772561  | 804191  | 835894  | 867629  | 899236  |
| 62       | 565957  | 593804  | 620247  | 645817  | 673006  | 701530  | 730116  | 758678  | 62       | 645797  | 676295  | 705716  | 734537  | 764843  | 796316  | 827866  | 859459  |
| 63       | 527725  | 555657  | 583236  | 609430  | 634770  | 661712  | 689979  | 718311  | 63       | 608446  | 638899  | 669248  | 698522  | 727201  | 757356  | 788668  | 820070  |
| 64       | 492261  | 518121  | 545765  | 573062  | 599008  | 624119  | 650813  | 678826  | 64       | 573307  | 601939  | 632236  | 662426  | 691548  | 720085  | 750088  | 781245  |
| 65       | 456613  | 481280  | 506807  | 534081  | 561025  | 586662  | 611490  | 637882  | 65       | 537774  | 565519  | 593952  | 624036  | 654003  | 682932  | 711281  | 741090  |
| 66       | 424469  | 444465  | 468757  | 493875  | 520710  | 547240  | 572507  | 597003  | 66       | 506242  | 528871  | 556362  | 584541  | 614350  | 644053  | 672737  | 700860  |
| 67       | 399973  | 413175  | 432902  | 456799  | 481511  | 507916  | 534038  | 558941  | 67       | 482610  | 497855  | 520301  | 547543  | 575465  | 605002  | 634438  | 662884  |
| 68       | 380537  | 389331  | 402424  | 421859  | 445365  | 469679  | 495659  | 521382  | 68       | 464145  | 474614  | 489785  | 512048  | 539037  | 566702  | 595972  | 625147  |
| 69       | 362973  | 370410  | 379200  | 392157  | 411298  | 434421  | 458344  | 483910  | 69       | 447177  | 456458  | 466918  | 482011  | 504086  | 530825  | 558237  | 587245  |
| 70       | 345919  | 350984  | 358417  | 367146  | 379908  | 398671  | 421306  | 444737  | 70       | 430771  | 437670  | 446952  | 457388  | 472365  | 494191  | 520604  | 547688  |
| 71       | 325225  | 332174  | 337308  | 344687  | 353313  | 365825  | 384126  | 406179  | 71       | 410344  | 419533  | 426470  | 435737  | 446126  | 460952  | 482467  | 508483  |
| 72       | 301748  | 312303  | 319231  | 324388  | 331704  | 340220  | 352481  | 370333  | 72       | 386147  | 399642  | 408803  | 415775  | 425013  | 435346  | 450016  | 471226  |
| 73       | 277160  | 289764  | 300135  | 307005  | 312172  | 319412  | 327815  | 339828  | 73       | 360112  | 376086  | 389423  | 398551  | 405544  | 414748  | 425018  | 439528  |
| 74       | 255896  | 266155  | 278477  | 288644  | 295448  | 300609  | 307767  | 316048  | 74       | 337021  | 350735  | 366477  | 379663  | 388750  | 395754  | 404911  | 415116  |
| 75       | 234424  | 243246  | 253231  | 265180  | 275074  | 281776  | 286906  | 293947  | 75       | 313164  | 325731  | 339196  | 354653  | 367631  | 376649  | 383653  | 392740  |
| 76       | 212880  | 220435  | 228972  | 238607  | 250101  | 259669  | 266230  | 271308  | 76       | 289454  | 300240  | 312522  | 325700  | 340791  | 353517  | 362435  | 369426  |
| 77       | 194623  | 200180  | 207506  | 215758  | 225046  | 236102  | 245346  | 251756  | 77       | 269558  | 277516  | 288075  | 300094  | 312979  | 327715  | 340183  | 348998  |
| 78       | 178618  | 183014  | 188442  | 195538  | 203506  | 212455  | 223084  | 232015  | 78       | 252120  | 258448  | 266284  | 276631  | 288383  | 300981  | 315365  | 327580  |
| 79       | 164617  | 167963  | 172285  | 177575  | 184439  | 192127  | 200748  | 210965  | 79       | 236384  | 241734  | 247992  | 255712  | 265849  | 277338  | 289646  | 303686  |
| 80       | 150617  | 152640  | 155939  | 160142  | 165243  | 171806  | 179143  | 187358  | 80       | 219851  | 223698  | 228999  | 235174  | 242733  | 252594  | 263744  | 275681  |
| 81       | 134287  | 137507  | 139589  | 142802  | 146841  | 151705  | 157911  | 164834  | 81       | 199569  | 205136  | 209001  | 214243  | 220307  | 227659  | 237180  | 247916  |
| 82       | 117650  | 122595  | 125746  | 127827  | 130941  | 134816  | 139444  | 145310  | 82       | 178090  | 186218  | 191662  | 195544  | 200702  | 206635  | 213776  | 222961  |
| 83       | 101485  | 107404  | 112107  | 115151  | 117209  | 120218  | 123922  | 128324  | 83       | 156606  | 166175  | 173993  | 179318  | 183189  | 188251  | 194042  | 200969  |
| 84       | 88028   | 92646   | 98213   | 102656  | 105586  | 107610  | 110506  | 114044  | 84       | 138332  | 146130  | 155268  | 162796  | 167993  | 171829  | 176781  | 182427  |
| 85       | 75039   | 78701   | 82992   | 88121   | 92250   | 95029   | 96990   | 99739   | 85       | 119959  | 126458  | 133822  | 142443  | 149597  | 154618  | 158391  | 163193  |
| 86       | 62005   | 65516   | 68871   | 72771   | 77413   | 81181   | 83775   | 85642   | 86       | 101190  | 107213  | 113239  | 120106  | 128116  | 134825  | 139621  | 143296  |
| 87       | 51010   | 54136   | 57332   | 60385   | 63926   | 68125   | 71564   | 73974   | 87       | 85233   | 90441   | 96009   | 101636  | 108030  | 115469  | 121753  | 126319  |
| 88       | 41749   | 44537   | 47372   | 50269   | 53045   | 56254   | 60054   | 63190   | 88       | 71601   | 76184   | 80992   | 86171   | 91417   | 97368   | 104277  | 110157  |
| 89       | 34394   | 36453   | 38975   | 41536   | 44156   | 46679   | 49587   | 53026   | 89       | 60572   | 64001   | 68228   | 72697   | 77509   | 82396   | 87931   | 94349   |
| 90+      | 120175  | 126957  | 134638  | 143286  | 152780  | 163055  | 173888  | 185523  | 90+      | 252883  | 267130  | 282908  | 300584  | 320111  | 341555  | 364745  | 390047  |
