# Supplementary material for: Public hospitalizations for stroke in Brazil from 2009 to 2016
Source: PubMed Central journal article supplement (PMC6424448; doi:10.1371/journal.pone.0213837), 2019-03-19
Supplement: pone.0213837.s003.pdf [file pone.0213837.s003.pdf]

## S1 Appendix. Age-adjustment methodology.

For each year, we calculated the age-standardized estimates for total hospitalization, in-hospital mortality and case fatality rates using the age-adjustment methodology proposed by Ahmad et al. [1]. This procedure aims to standardize or age-adjust the in-hospital mortality and hospitalization rates and can be calculated as a weighted average of the age-specific rates, for each of the populations to be compared. The weights represent the relative age distribution of the standard external population. So, the age-adjustment methodology provides, for each population, a standardized rate that reflects the number of events that would have been expected if the populations being compared had had identical age distribution.

Therefore, the age-adjusted in-hospital mortality rate in 2009 and 2010, for example, can be calculated by the equations (1) and (2).

$$M^{2009} = \sum r_i^{2009} \left( \frac{n_i}{\sum_i n_i} \right) \quad (1)$$

$$M^{2010} = \sum r_i^{2010} \left( \frac{n_i}{\sum_i n_i} \right) \quad (2)$$

where  $n_i$  is the WHO World Standard population in the  $i$ th age group [1] (see Table below),  $r_i^{2009}$  and  $r_i^{2010}$  are the in-hospital mortality rates per 100,000 inhabitants for age group  $i$  in 2009 and 2010, respectively.

Regarding the age-adjusted hospitalization rate, the formulation is similar, as demonstrated in equations (3) and (4).

$$I^{2009} = \sum z_i^{2009} \left( \frac{n_i}{\sum_i n_i} \right) \quad (3)$$

$$I^{2010} = \sum z_i^{2010} \left( \frac{n_i}{\sum_i n_i} \right) \quad (4)$$

where  $z_i^{2009}$  and  $z_i^{2010}$  are the hospitalization rates per 100,000 inhabitants for age group  $i$  in 2009 and 2010, respectively.

In terms of case fatality, we divided the age-adjusted in-hospital mortality rate by the age-adjusted hospitalization rate, as demonstrated by the equations (5) and (6).

$$F^{2009} = \frac{M^{2009}}{I^{2009}} \quad (5)$$

$$F^{2010} = \frac{M^{2010}}{I^{2010}} \quad (6)$$

The Table below presents the WHO World Standard population for each age group ( $n_i$ ) used in this work, as proposed by Ahmad et al. [1].

**Table. Standard Population Distribution (percent). Adapted from Ahmad et al. [1].**

| Age Group | WHO World Standard (%) |
|-----------|------------------------|
| 0-4       | 8.86                   |
| 5-9       | 8.69                   |
| 10-14     | 8.60                   |
| 15-19     | 8.47                   |
| 20-24     | 8.22                   |
| 25-29     | 7.93                   |
| 30-34     | 7.61                   |
| 35-39     | 7.15                   |
| 40-44     | 6.59                   |
| 45-49     | 6.04                   |
| 50-54     | 5.37                   |
| 55-59     | 4.55                   |
| 60-64     | 3.72                   |
| 65-69     | 2.96                   |
| 70-74     | 2.21                   |
| 75-79     | 1.52                   |
| 80-84     | 0.91                   |
| 85+       | 0.63                   |
| Total     | 100                    |

## Reference

[1] Ahmad OB, Boschi-Pinto C, Lopez AD, Murray CJ, Lozano R, Inoue M. Age Standardization of rates: A new who standard. In: Organization WH, editor. 2001. p. 1–14.
